# Supplementary material
Source: PubMed Central journal article supplement (PMC8973826)
Supplement: 13011_2022_452_MOESM1_ESM.pdf [file 13011_2022_452_MOESM1_ESM.pdf]

# TAKE HOME NALOXONE: DISTRIBUTION RECORD

Fax/email this form **monthly** to 604.707.2516 or naloxone@bccdc.ca

Site ID# \_\_\_\_\_ Full Site Name \_\_\_\_\_ City \_\_\_\_\_

| DATE KIT GIVEN OUT | KIT RECIPIENT DESCRIPTION                                                      |                                                                                                    |                                                                 |                                                                 | NOTES <b>**Optional Site Use**</b><br><u>(not required by BCCDC)</u>                                                                                        |                                    |
|--------------------|--------------------------------------------------------------------------------|----------------------------------------------------------------------------------------------------|-----------------------------------------------------------------|-----------------------------------------------------------------|-------------------------------------------------------------------------------------------------------------------------------------------------------------|------------------------------------|
|                    | OD RISK                                                                        | GENDER                                                                                             | AGE RANGE (YRS)                                                 |                                                                 |                                                                                                                                                             | 1 <sup>ST</sup> KIT OR REPLACEMENT |
| MM/DD/YYYY         | <input type="checkbox"/> At risk of OD<br><input type="checkbox"/> Not at Risk | <input type="checkbox"/> Male<br><input type="checkbox"/> Female<br><input type="checkbox"/> Other | <input type="checkbox"/> < 19<br><input type="checkbox"/> 31-60 | <input type="checkbox"/> 19-30<br><input type="checkbox"/> > 60 | <input type="checkbox"/> 1 <sup>st</sup> Kit<br><input type="checkbox"/> Replacement (Last Kit Used)<br><input type="checkbox"/> Replacement (Other Reason) |                                    |
| MM/DD/YYYY         | <input type="checkbox"/> At risk of OD<br><input type="checkbox"/> Not at Risk | <input type="checkbox"/> Male<br><input type="checkbox"/> Female<br><input type="checkbox"/> Other | <input type="checkbox"/> < 19<br><input type="checkbox"/> 31-60 | <input type="checkbox"/> 19-30<br><input type="checkbox"/> > 60 | <input type="checkbox"/> 1 <sup>st</sup> Kit<br><input type="checkbox"/> Replacement (Last Kit Used)<br><input type="checkbox"/> Replacement (Other Reason) |                                    |
| MM/DD/YYYY         | <input type="checkbox"/> At risk of OD<br><input type="checkbox"/> Not at Risk | <input type="checkbox"/> Male<br><input type="checkbox"/> Female<br><input type="checkbox"/> Other | <input type="checkbox"/> < 19<br><input type="checkbox"/> 31-60 | <input type="checkbox"/> 19-30<br><input type="checkbox"/> > 60 | <input type="checkbox"/> 1 <sup>st</sup> Kit<br><input type="checkbox"/> Replacement (Last Kit Used)<br><input type="checkbox"/> Replacement (Other Reason) |                                    |
| MM/DD/YYYY         | <input type="checkbox"/> At risk of OD<br><input type="checkbox"/> Not at Risk | <input type="checkbox"/> Male<br><input type="checkbox"/> Female<br><input type="checkbox"/> Other | <input type="checkbox"/> < 19<br><input type="checkbox"/> 31-60 | <input type="checkbox"/> 19-30<br><input type="checkbox"/> > 60 | <input type="checkbox"/> 1 <sup>st</sup> Kit<br><input type="checkbox"/> Replacement (Last Kit Used)<br><input type="checkbox"/> Replacement (Other Reason) |                                    |
| MM/DD/YYYY         | <input type="checkbox"/> At risk of OD<br><input type="checkbox"/> Not at Risk | <input type="checkbox"/> Male<br><input type="checkbox"/> Female<br><input type="checkbox"/> Other | <input type="checkbox"/> < 19<br><input type="checkbox"/> 31-60 | <input type="checkbox"/> 19-30<br><input type="checkbox"/> > 60 | <input type="checkbox"/> 1 <sup>st</sup> Kit<br><input type="checkbox"/> Replacement (Last Kit Used)<br><input type="checkbox"/> Replacement (Other Reason) |                                    |
| MM/DD/YYYY         | <input type="checkbox"/> At risk of OD<br><input type="checkbox"/> Not at Risk | <input type="checkbox"/> Male<br><input type="checkbox"/> Female<br><input type="checkbox"/> Other | <input type="checkbox"/> < 19<br><input type="checkbox"/> 31-60 | <input type="checkbox"/> 19-30<br><input type="checkbox"/> > 60 | <input type="checkbox"/> 1 <sup>st</sup> Kit<br><input type="checkbox"/> Replacement (Last Kit Used)<br><input type="checkbox"/> Replacement (Other Reason) |                                    |
| MM/DD/YYYY         | <input type="checkbox"/> At risk of OD<br><input type="checkbox"/> Not at Risk | <input type="checkbox"/> Male<br><input type="checkbox"/> Female<br><input type="checkbox"/> Other | <input type="checkbox"/> < 19<br><input type="checkbox"/> 31-60 | <input type="checkbox"/> 19-30<br><input type="checkbox"/> > 60 | <input type="checkbox"/> 1 <sup>st</sup> Kit<br><input type="checkbox"/> Replacement (Last Kit Used)<br><input type="checkbox"/> Replacement (Other Reason) |                                    |
| MM/DD/YYYY         | <input type="checkbox"/> At risk of OD<br><input type="checkbox"/> Not at Risk | <input type="checkbox"/> Male<br><input type="checkbox"/> Female<br><input type="checkbox"/> Other | <input type="checkbox"/> < 19<br><input type="checkbox"/> 31-60 | <input type="checkbox"/> 19-30<br><input type="checkbox"/> > 60 | <input type="checkbox"/> 1 <sup>st</sup> Kit<br><input type="checkbox"/> Replacement (Last Kit Used)<br><input type="checkbox"/> Replacement (Other Reason) |                                    |
| MM/DD/YYYY         | <input type="checkbox"/> At risk of OD<br><input type="checkbox"/> Not at Risk | <input type="checkbox"/> Male<br><input type="checkbox"/> Female<br><input type="checkbox"/> Other | <input type="checkbox"/> < 19<br><input type="checkbox"/> 31-60 | <input type="checkbox"/> 19-30<br><input type="checkbox"/> > 60 | <input type="checkbox"/> 1 <sup>st</sup> Kit<br><input type="checkbox"/> Replacement (Last Kit Used)<br><input type="checkbox"/> Replacement (Other Reason) |                                    |
| MM/DD/YYYY         | <input type="checkbox"/> At risk of OD<br><input type="checkbox"/> Not at Risk | <input type="checkbox"/> Male<br><input type="checkbox"/> Female<br><input type="checkbox"/> Other | <input type="checkbox"/> < 19<br><input type="checkbox"/> 31-60 | <input type="checkbox"/> 19-30<br><input type="checkbox"/> > 60 | <input type="checkbox"/> 1 <sup>st</sup> Kit<br><input type="checkbox"/> Replacement (Last Kit Used)<br><input type="checkbox"/> Replacement (Other Reason) |                                    |
| MM/DD/YYYY         | <input type="checkbox"/> At risk of OD<br><input type="checkbox"/> Not at Risk | <input type="checkbox"/> Male<br><input type="checkbox"/> Female<br><input type="checkbox"/> Other | <input type="checkbox"/> < 19<br><input type="checkbox"/> 31-60 | <input type="checkbox"/> 19-30<br><input type="checkbox"/> > 60 | <input type="checkbox"/> 1 <sup>st</sup> Kit<br><input type="checkbox"/> Replacement (Last Kit Used)<br><input type="checkbox"/> Replacement (Other Reason) |                                    |
| MM/DD/YYYY         | <input type="checkbox"/> At risk of OD<br><input type="checkbox"/> Not at Risk | <input type="checkbox"/> Male<br><input type="checkbox"/> Female<br><input type="checkbox"/> Other | <input type="checkbox"/> < 19<br><input type="checkbox"/> 31-60 | <input type="checkbox"/> 19-30<br><input type="checkbox"/> > 60 | <input type="checkbox"/> 1 <sup>st</sup> Kit<br><input type="checkbox"/> Replacement (Last Kit Used)<br><input type="checkbox"/> Replacement (Other Reason) |                                    |
| MM/DD/YYYY         | <input type="checkbox"/> At risk of OD<br><input type="checkbox"/> Not at Risk | <input type="checkbox"/> Male<br><input type="checkbox"/> Female<br><input type="checkbox"/> Other | <input type="checkbox"/> < 19<br><input type="checkbox"/> 31-60 | <input type="checkbox"/> 19-30<br><input type="checkbox"/> > 60 | <input type="checkbox"/> 1 <sup>st</sup> Kit<br><input type="checkbox"/> Replacement (Last Kit Used)<br><input type="checkbox"/> Replacement (Other Reason) |                                    |
| MM/DD/YYYY         | <input type="checkbox"/> At risk of OD<br><input type="checkbox"/> Not at Risk | <input type="checkbox"/> Male<br><input type="checkbox"/> Female<br><input type="checkbox"/> Other | <input type="checkbox"/> < 19<br><input type="checkbox"/> 31-60 | <input type="checkbox"/> 19-30<br><input type="checkbox"/> > 60 | <input type="checkbox"/> 1 <sup>st</sup> Kit<br><input type="checkbox"/> Replacement (Last Kit Used)<br><input type="checkbox"/> Replacement (Other Reason) |                                    |
| MM/DD/YYYY         | <input type="checkbox"/> At risk of OD<br><input type="checkbox"/> Not at Risk | <input type="checkbox"/> Male<br><input type="checkbox"/> Female<br><input type="checkbox"/> Other | <input type="checkbox"/> < 19<br><input type="checkbox"/> 31-60 | <input type="checkbox"/> 19-30<br><input type="checkbox"/> > 60 | <input type="checkbox"/> 1 <sup>st</sup> Kit<br><input type="checkbox"/> Replacement (Last Kit Used)<br><input type="checkbox"/> Replacement (Other Reason) |                                    |
